# Supplementary material
Source: PubMed Central journal article supplement (PMC552912)
Supplement: pnas_102_9_3266__2.pdf [file pnas_102_9_3266__2.pdf]

Table with 15 columns and 18 rows of sequence data. Includes labels like Sc.Cfd1, Ca.Cfd1, Nc.Cfd1, Dd.Cfd1, Rn.Cfd1, Mm.Cfd1, Hs.Cfd1, Dm.Cfd1, Sc.Nbp35, Ca.Nbp35, Nc.Nbp35, Dd.Nbp35, Mm.Nbp35, Rn.Nbp35, Hs.Nbp35, Dm.Nbp35, and Consensus. The Consensus row shows a sequence of characters and symbols.

Table with 15 columns and 18 rows of sequence data. Includes labels like Sc.Cfd1, Ca.Cfd1, Nc.Cfd1, Dd.Cfd1, Rn.Cfd1, Mm.Cfd1, Hs.Cfd1, Dm.Cfd1, Sc.Nbp35, Ca.Nbp35, Nc.Nbp35, Dd.Nbp35, Mm.Nbp35, Rn.Nbp35, Hs.Nbp35, Dm.Nbp35, and Consensus. The Consensus row shows a sequence of characters and symbols.

Table with 15 columns and 18 rows of sequence data. Includes labels like Sc.Cfd1, Ca.Cfd1, Nc.Cfd1, Dd.Cfd1, Rn.Cfd1, Mm.Cfd1, Hs.Cfd1, Dm.Cfd1, Sc.Nbp35, Ca.Nbp35, Nc.Nbp35, Dd.Nbp35, Mm.Nbp35, Rn.Nbp35, Hs.Nbp35, Dm.Nbp35, and Consensus. The Consensus row shows a sequence of characters and symbols.
