# Supplementary material
Source: PubMed Central journal article supplement (PMC552912)

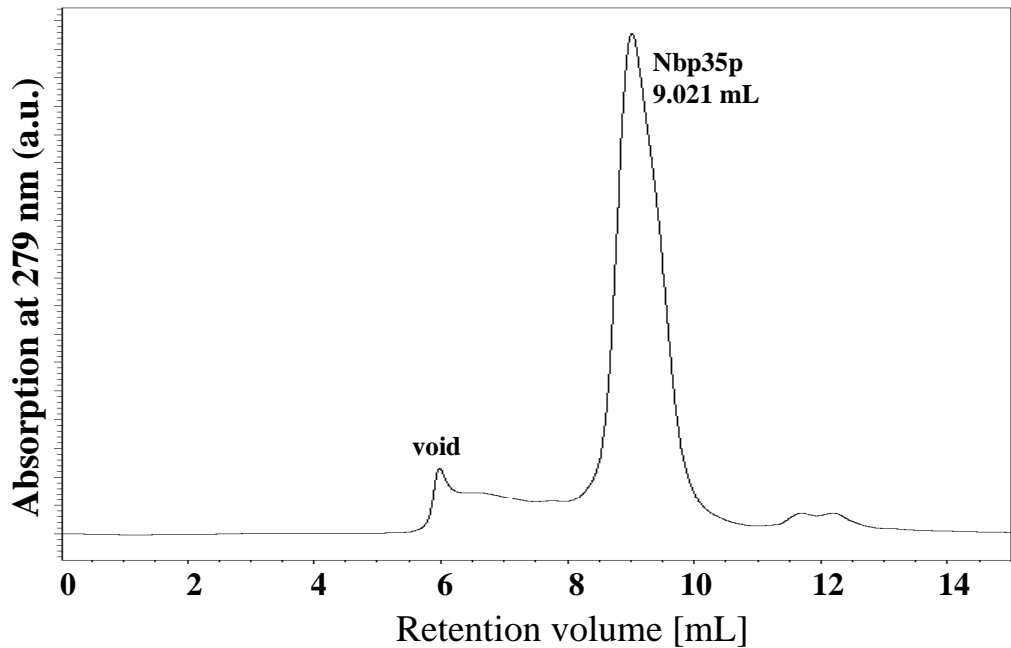

Supplement: pnas_102_9_3266__1.pdf [file pnas_102_9_3266__1.pdf]

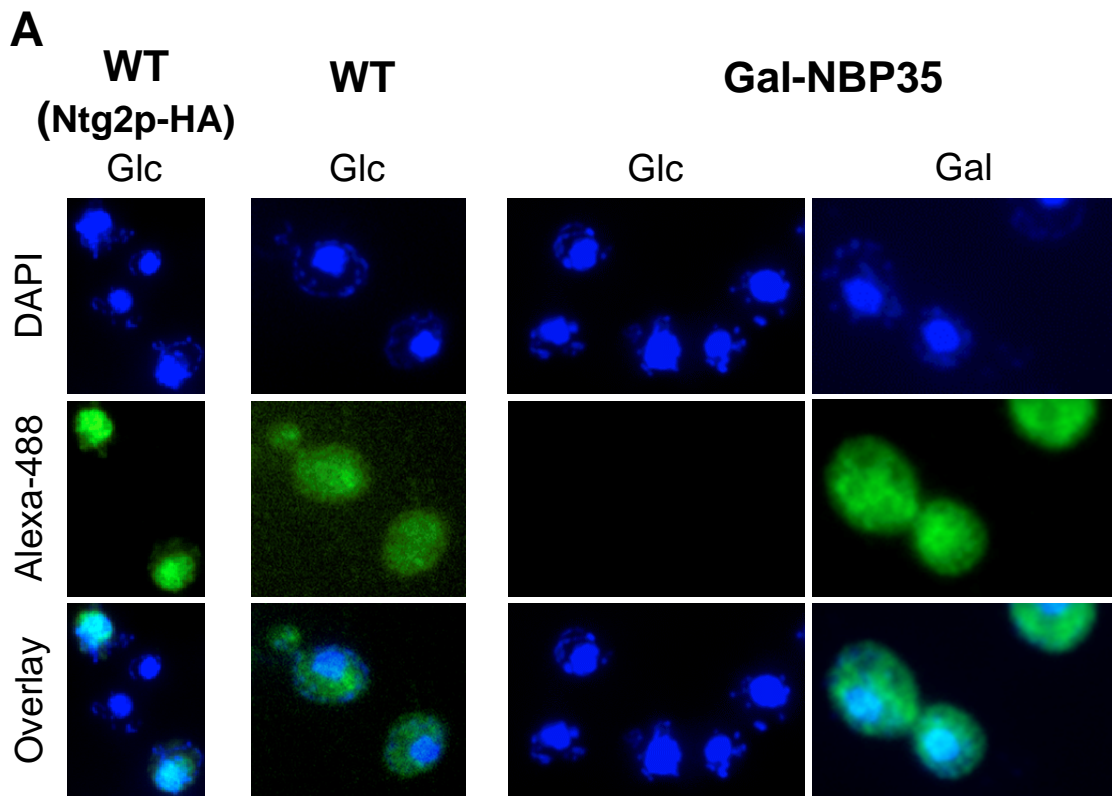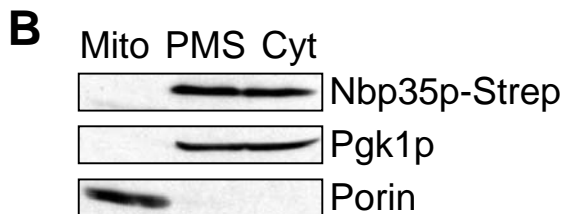

Supplement: pnas_102_9_3266__3.pdf [file pnas_102_9_3266__3.pdf]
